# Supplementary material
Source: Springer Nature journal article supplement (https://www.springermedizin.de/resource/supplementary/12911_2013_818_MOESM3_ESM.pdf/9526704)
Supplement: MOESM3 [file 9526704]

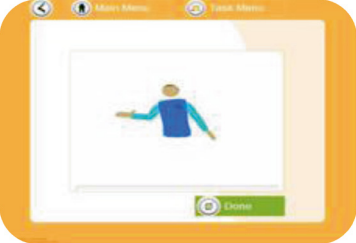

a: On-screen display during exercise.

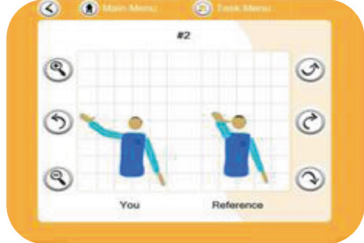

b: On-screen display following exercise.

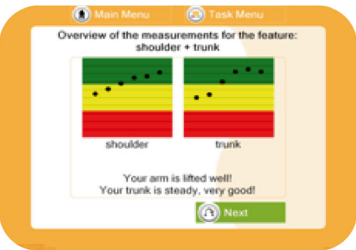

c: Qualitative chart feedback.

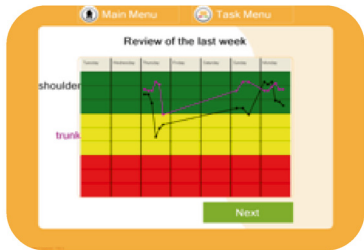

d: Summary feedback.
